# Supplementary material for: Intratumoral Bicarbonate Functions as an Adjuvant to Potentiate PD-1 Blockade in Hepatocellular Carcinoma
Source: Research Square preprint supplement (doi:10.21203/rs.3.rs-7655792/v1), 2025-10-08
Supplement: Supplementary file 1 [file 289538f45d698bdd6b93d5c6.pdf]

Supplemental material

**Intratumoral Bicarbonate Functions as an Adjuvant to Potentiate PD-1 Blockade  
in Hepatocellular Carcinoma**

Di Wang<sup>1,5#</sup>, Kai Jin<sup>2#</sup>, Chang Ying<sup>1,5#</sup>, Bin Li<sup>2</sup>, Guangqiang Zhang<sup>2</sup>, Jiangtao Li<sup>4</sup>,  
Lirong Chen<sup>3</sup>, Ming Chao<sup>\*2</sup>, Xun Hu<sup>\*1,5</sup>

<sup>1</sup>Cancer Institute (The Key Laboratory for Cancer Intervention and Prevention, China National  
Ministry of Education), The Second Affiliated Hospital, Zhejiang University School of Medicine

<sup>2</sup> Interventional Radiology, The Second Affiliated Hospital, Zhejiang University School of  
Medicine

<sup>3</sup> Department of Pathology, The Second Affiliated Hospital, Zhejiang University School of  
Medicine

<sup>4</sup> Department of Surgery, The Second Affiliated Hospital, Zhejiang University School of Medicine

<sup>5</sup> Cancer Center of Zhejiang University, Hangzhou, Zhejiang, China

# Equal contributors

\* Corresponding to: [chaoming@zju.edu.cn](mailto:chaoming@zju.edu.cn), [huxun@zju.edu.cn](mailto:huxun@zju.edu.cn)

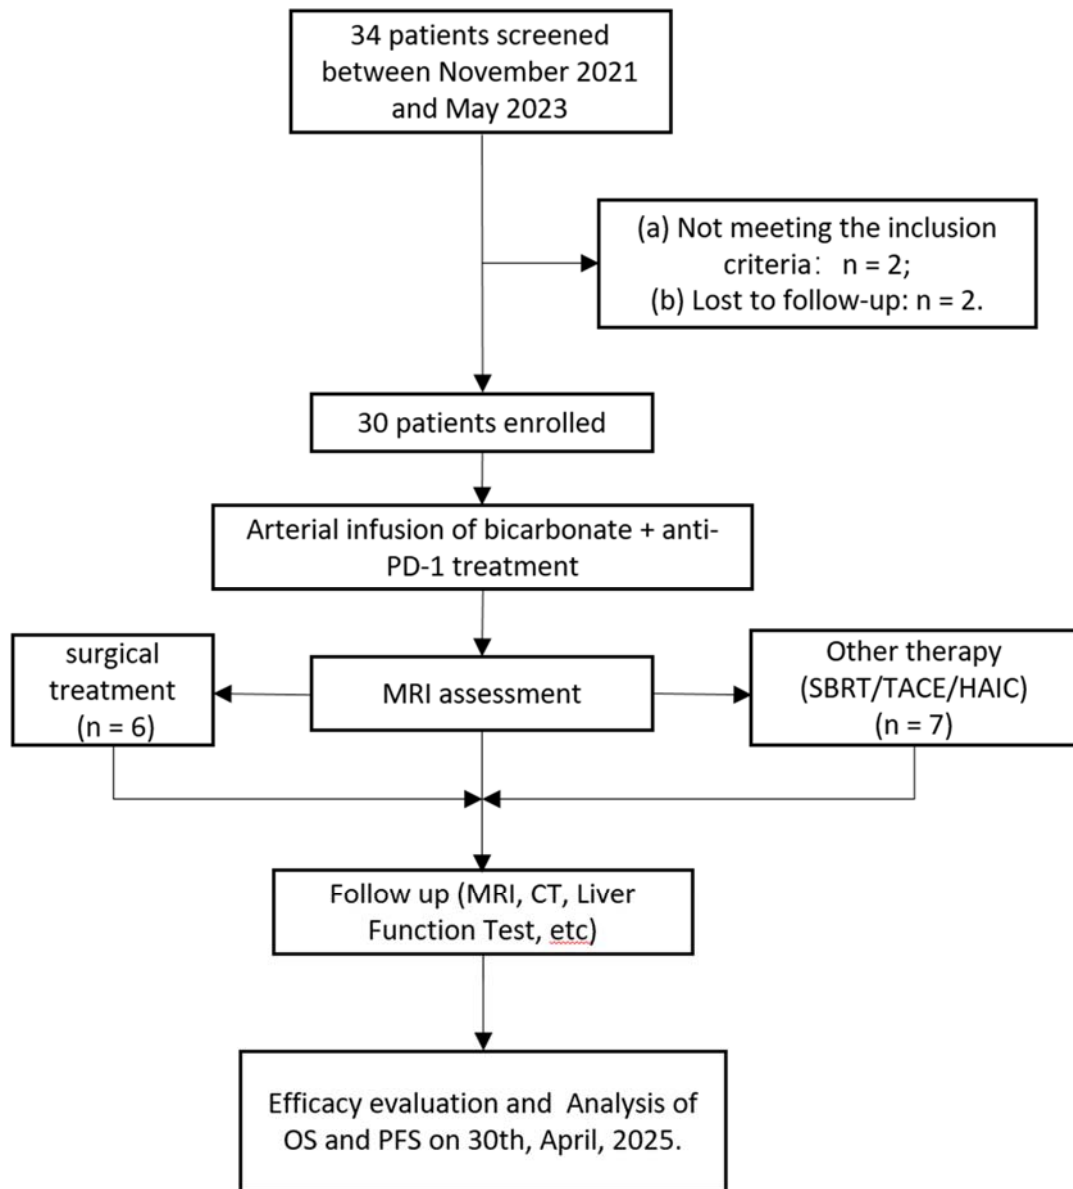

**Figure S1. Trial flow diagram.**

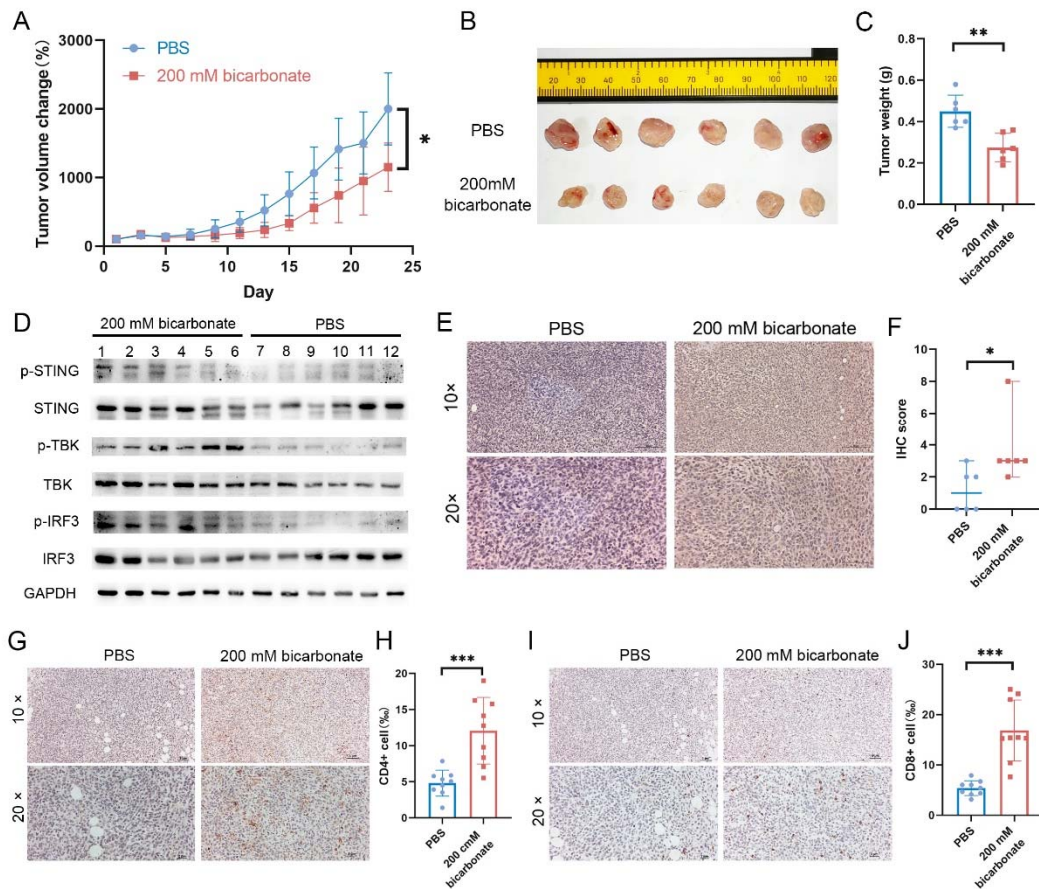

**Figure S2. Bicarbonate inhibits tumor growth.** Twelve BALB/c mice were orthotopically inoculated with 4T1 cells in the mammary fat pad. When tumor size reached 4 to 6 mm in the largest diameter, the mice were divided into two groups and received intratumoral injections of either PBS or 200 mM bicarbonate every other day. (A) Tumor volume of 4T1 orthotopic tumors. (B) Tumors were dissected and photographed after 12 injections. (C) Tumor weight. (D) Phosphorylation levels of STING/TBK1/IRF3 in tumor tissues. (E) Representative IHC image showing IFN- $\alpha$  expression in tumor tissues. (F) IHC scoring of IFN- $\alpha$  in tumor tissues. (G) Representative IHC image showing CD4<sup>+</sup> cells in tumor tissues. (H) Percentage of CD4<sup>+</sup> cells in tumor tissues. (I) Representative IHC image showing CD8<sup>+</sup> cells in tumor tissues. (J) Percentage of CD8<sup>+</sup> cells in tumor tissues. Data are presented as mean  $\pm$  SD (n = 6). Statistical analyses: two-way ANOVA for (A), Mann-Whitney U test for (F), and two-tailed Student's t-tests for the other comparisons. \*p < 0.05, \*\*p < 0.01, \*\*\*p < 0.001.



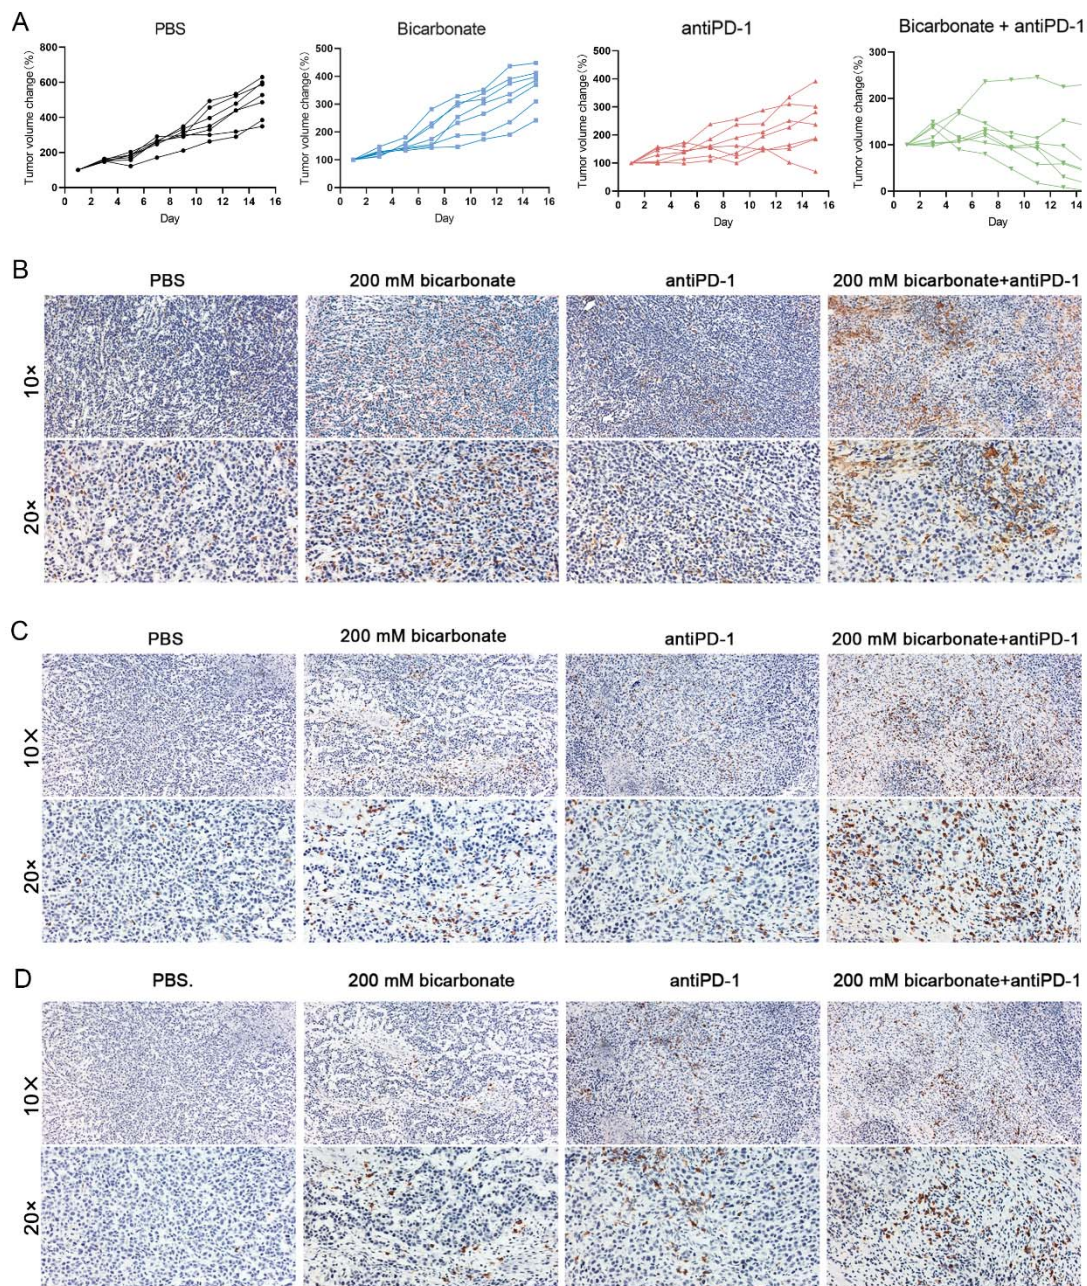

**Figure S3. Intratumoral Injection of bicarbonate Combined with AntiPD-1 Therapy for Breast Cancer.** (A) Individual tumor volume changes in each mouse. (B) Representative IHC images of CD11c<sup>+</sup> cells in breast tumor tissues. (C) Representative IHC images of CD8<sup>+</sup> cells in breast tumor tissues. (D) Representative IHC images of CD4<sup>+</sup> cells in breast tumor tissues.



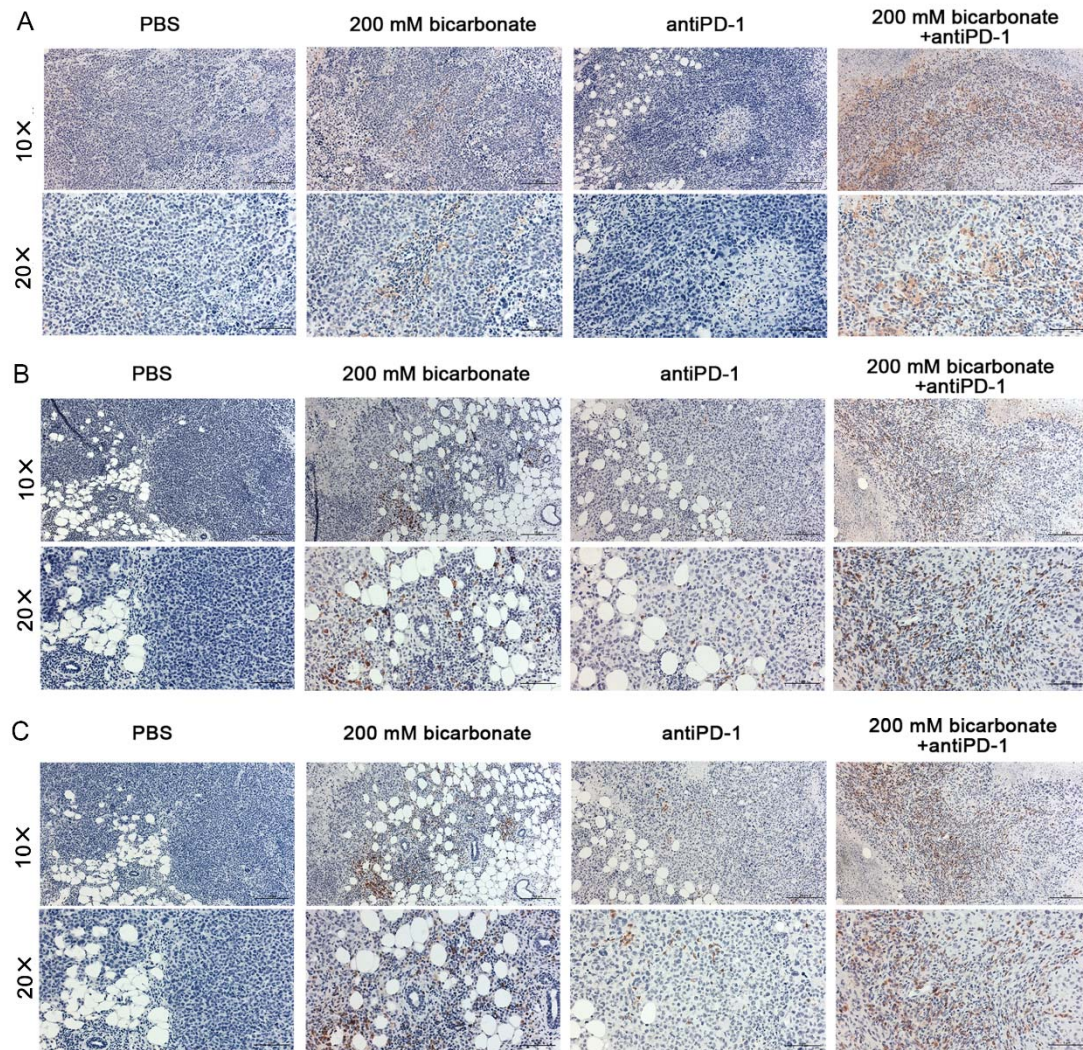

**Figure S4. Intratumoral Injection of bicarbonate Combined with AntiPD-1 Therapy for HCC.**

(A) Representative IHC images of CD11c<sup>+</sup> cells in breast tumor tissues. (B) Representative IHC images of CD8<sup>+</sup> cells in breast tumor tissues. (C) Representative IHC images of CD4<sup>+</sup> cells in breast tumor tissues.



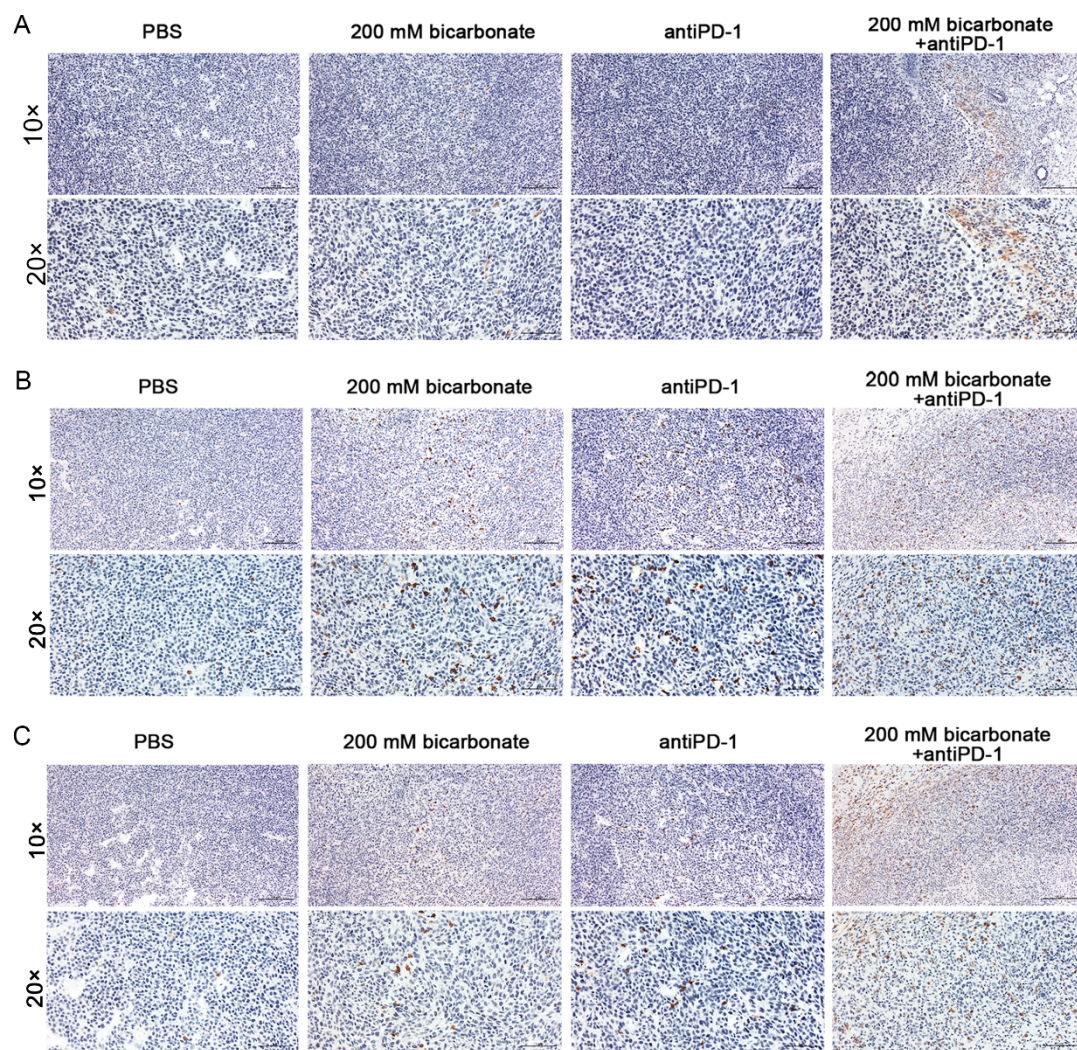

**Figure S5. Intratumoral Injection of bicarbonate Combined with AntiPD-1 Therapy for CRC.**

(A) Representative IHC images of CD11c<sup>+</sup> cells in breast tumor tissues. (B) Representative IHC images of CD8<sup>+</sup> cells in breast tumor tissues. (C) Representative IHC images of CD4<sup>+</sup> cells in breast tumor tissues.

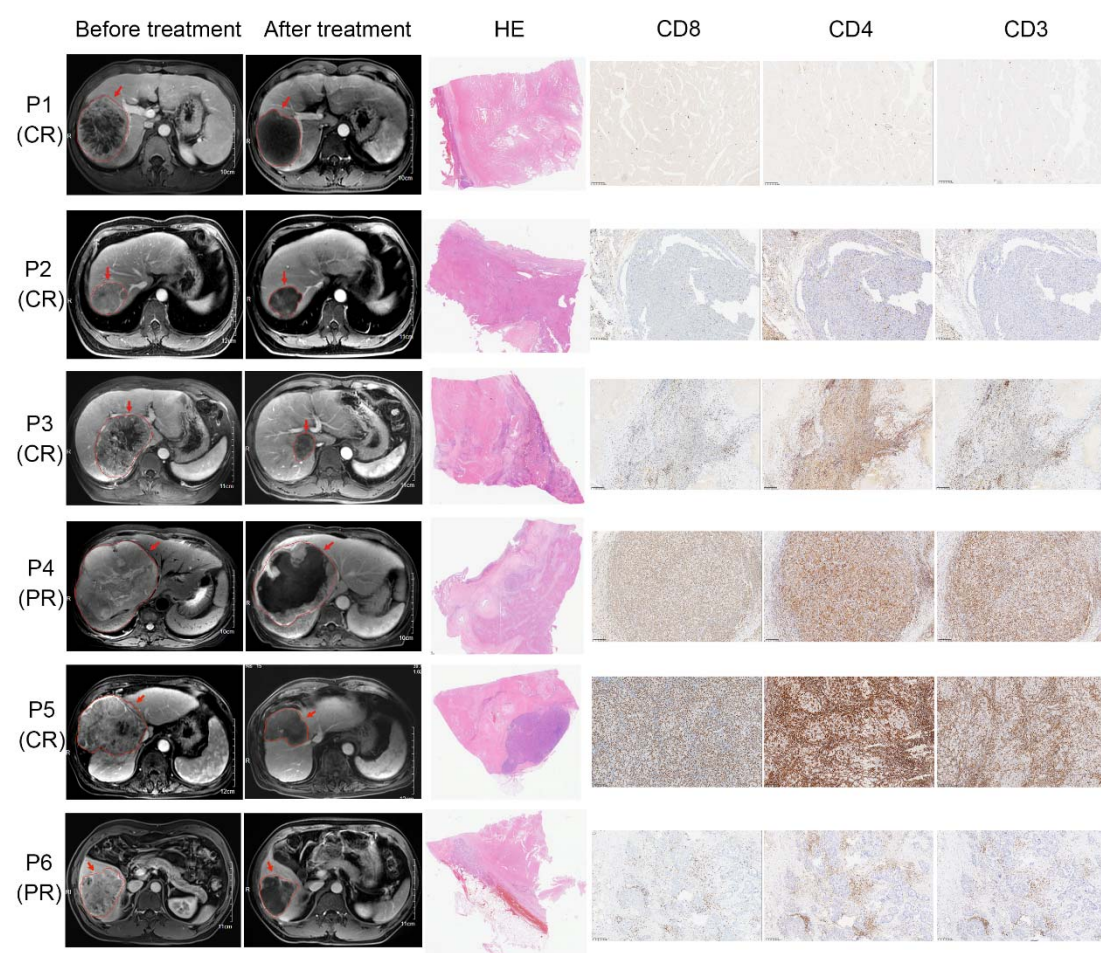

**Figure S6. The treatment response, MRI images, and pathological slices of patients (P1-P6) in the bicarbonate + antiPD-1 group.** For each patient, the images are arranged from left to right: before treatment MRI image, after treatment MRI image, HE staining image, CD8 IHC image, CD4 IHC image, and CD3 IHC image. In the MRI images, the red circle indicated by the arrow marks the tumor region.



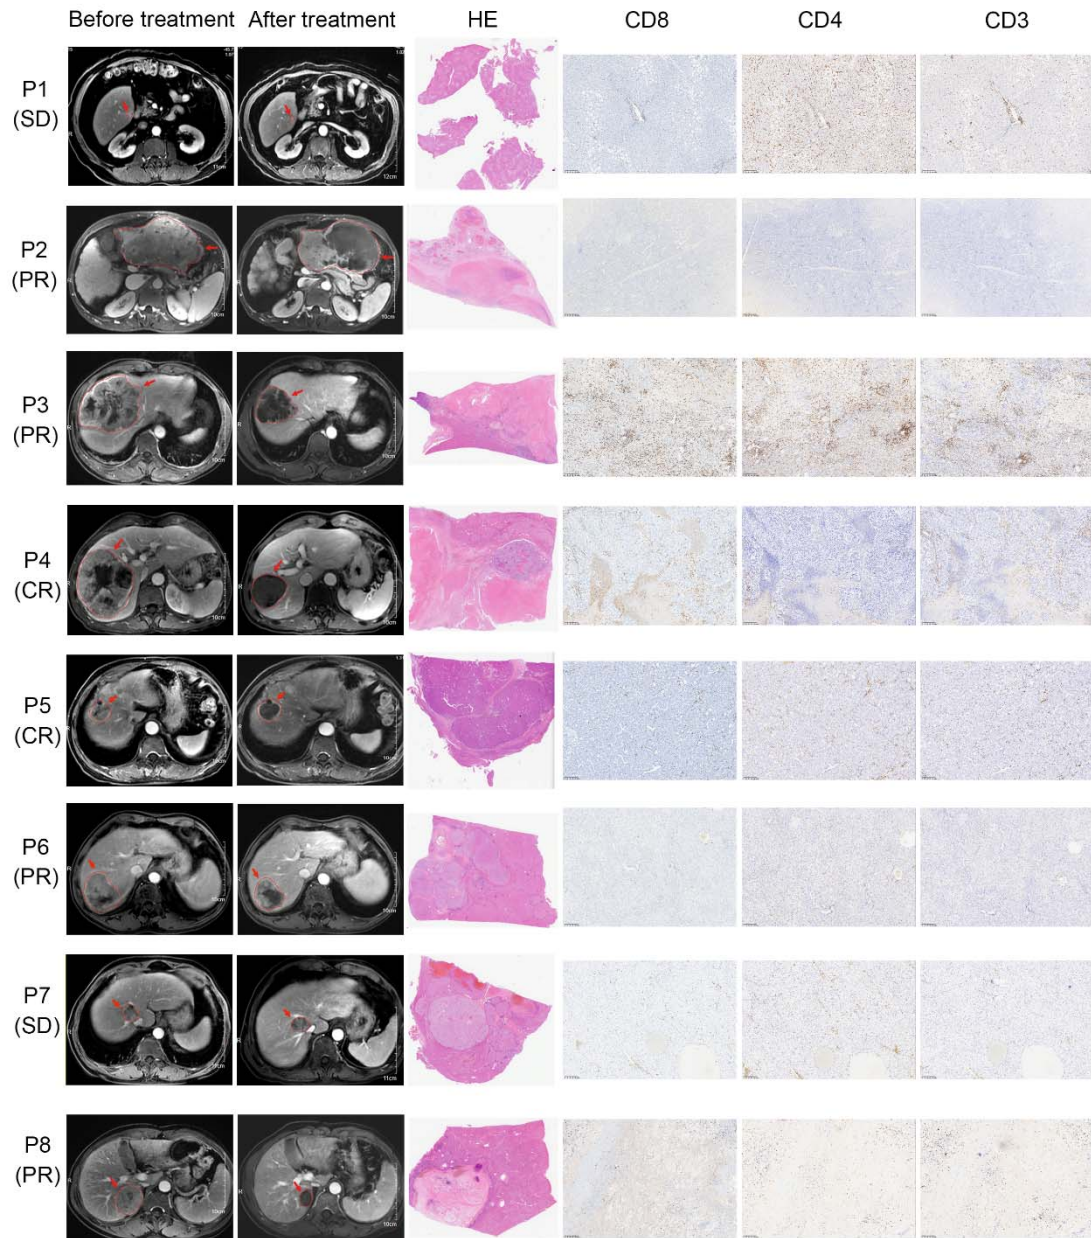

**Figure S7. The treatment response, MRI images, and pathological slices of patients in the antiPD-1 group.** 8 patients (P1-P8), with each patient's images arranged from left to right as follows: before treatment MRI image, after treatment MRI image, HE staining image, CD8 IHC image, CD4 IHC image, and CD3 IHC image. In the MRI images, the red circle indicated by the arrow marks the tumor region.



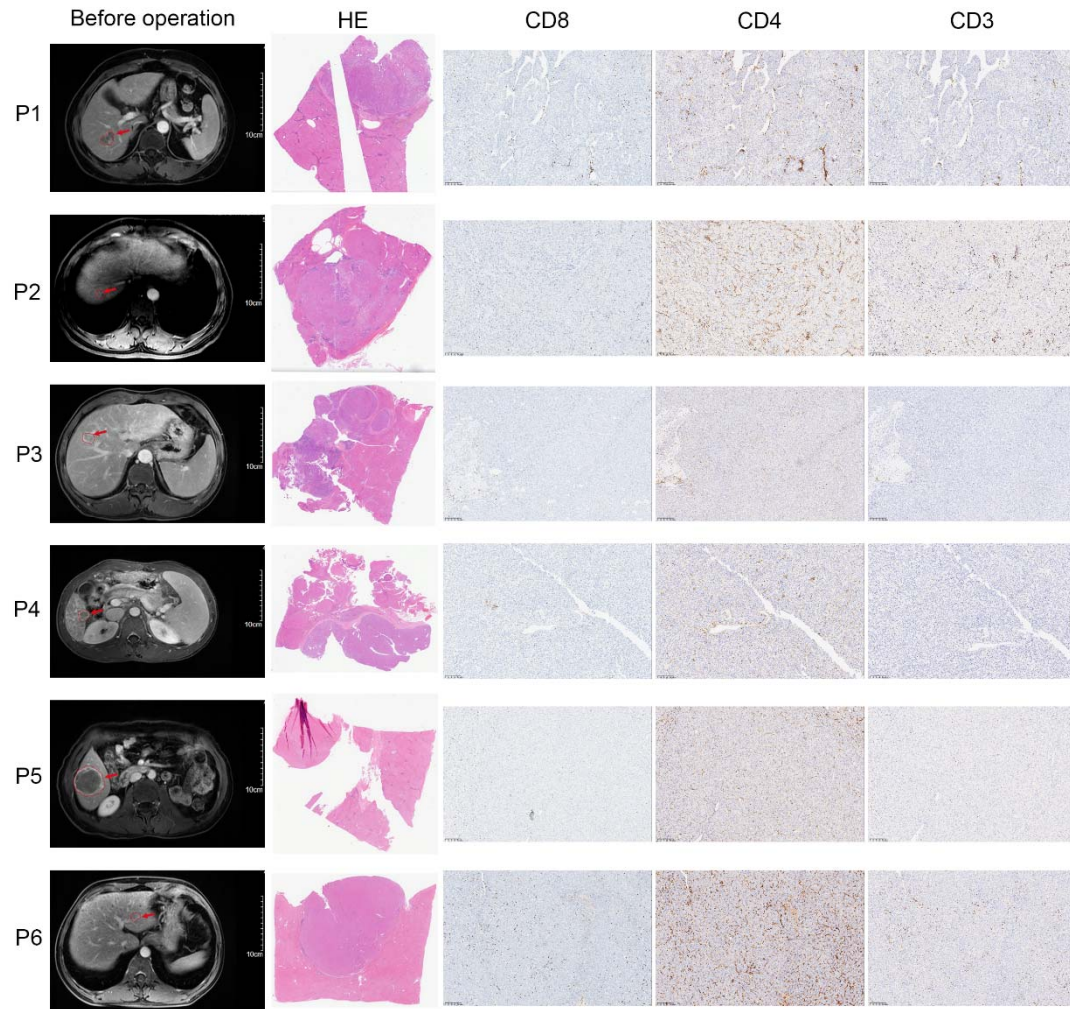

**Figure S8. The MRI images and pathological slices of patients (P1-P6) in the surgery group.**

Before operation MRI images, HE staining image, CD8 IHC image, CD4 IHC image, and CD3 IHC image of surgery group patients (P1-P6). The red circle indicating the tumor region is marked by an arrow in the MRI images.

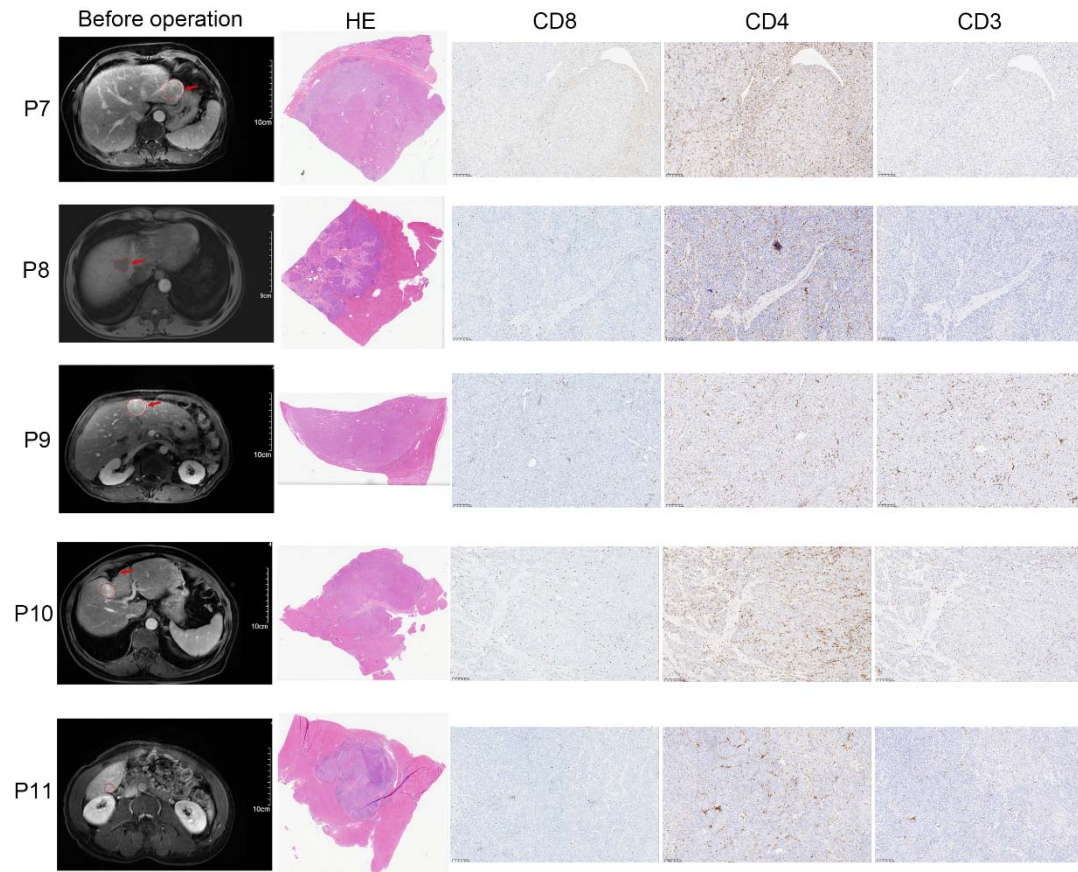

**Figure S9. The MRI images and pathological slices of patients (P7-P11) in the surgery group.**

Before operation MRI images, HE staining image, CD8 IHC image, CD4 IHC image, and CD3 IHC image of surgery group patients (P7-P11). The red circle indicating the tumor region is marked by an arrow in the MRI images.



**Table S1. Primers**

| Primers               | Sequences               |
|-----------------------|-------------------------|
| Homo-GAPDH-F          | AGATCCCTCCAAAATCAAGTGG  |
| Homo-GAPDH-R          | GGCAGAGATGATGACCCTTTT   |
| Homo-ND1-F            | CTCTTCGTCTGATCCGTCCT    |
| Homo-ND1-R            | TGAGGTTGAGGTCTGTTAGT    |
| Homo-ND2-F            | GTAGACAGTCCCACCCTCAC    |
| Homo-ND2-R            | TTGATCCCGTTTCGTGCAAG    |
| Homo-IFN- $\beta$ -F  | ATGACCAACAAGTGTCTCCTCC  |
| Homo-IFN- $\beta$ -R  | GGAATCCAAGCAAGTTGTAGCTC |
| Homo-IFN- $\alpha$ -F | GCTTGGGATGAGACCCTCCTA   |
| Homo-IFN- $\alpha$ -R | CCCACCCCCTGTATCACAC     |

**Table S2. Antibodies**

| Target                    | Catalog number | Brand               | RRID        |
|---------------------------|----------------|---------------------|-------------|
| Calreticulin              | 27298-1-AP     | Proteintech (China) | AB_2880835  |
| HMGB1                     | 10829-1-AP     | Proteintech (China) | AB_2232989  |
| STING                     | 19851-1-AP     | Proteintech (China) | AB_10665370 |
| Phospho-STING (Ser366)    | 50907          | CST (USA)           | AB_2827656  |
| Phospho-STING (Ser365)    | 72971          | CST (USA)           | AB_2799831  |
| IRF3                      | 11312-1-AP     | Proteintech (China) | AB_2127004  |
| IRF3                      | 4302           | CST (USA)           | AB_1904036  |
| Phospho-IRF-3 (Ser396)    | 4947           | CST (USA)           | AB_823547   |
| TBK1/NKA                  | 3504           | CST (USA)           | AB_2255663  |
| Phospho-TBK1/NAK (Ser172) | 5483           | CST (USA)           | AB_10693472 |
| dsDNA                     | ab27156        | Abcam (USA)         | AB_470907   |
| GAPDH                     | 2118           | CST (USA)           | AB_561053   |
| PD-1                      | BE0146         | bio X cell (USA)    | AB_10949053 |
| CD11c                     | 97585          | CST (USA)           | AB_2800282  |
| CD8                       | ab217344       | Abcam (USA)         | AB_2890649  |
| CD4                       | ab183685       | Abcam (USA)         | AB_2686917  |
| CD3                       | 17617-1-AP     | Proteintech (China) | AB_1939430  |
| IFN- $\alpha$ 2           | ab193055       | Abcam (USA)         | AB_3076700  |



**Table S3. The characteristics of patients**

| Variables                          | Hepatic arterial infusion of bicarbonate + antiPD-1 |
|------------------------------------|-----------------------------------------------------|
| Cases                              | 30                                                  |
| Gender (M/F)                       | 23/7                                                |
| Median age, years                  | 59 (range 26 - 85)                                  |
| HBV                                | 27 (90.0%)                                          |
| AST, U/L                           | 70.8±45.5                                           |
| ALT, U/L                           | 46.5±26.5                                           |
| AFP > 400 ng/mL                    | 20 (66.7%)                                          |
| Bilirubin, $\mu$ mol/L             | 19.6±8.1                                            |
| Albumin, g/L                       | 39.2±4.9                                            |
| Child-Pugh class                   |                                                     |
| A                                  | 29 (96.7%)                                          |
| B                                  | 1 (3.3%)                                            |
| The size of largest tumor:         | 11.4 (range 5.6 – 16.3)                             |
| Tumor diameter $\leq$ 5 cm         | 0                                                   |
| 5 cm < Tumor diameter $\leq$ 10 cm | 11 (36.7%)                                          |
| Tumor diameter >10 cm              | 19 (63.3%)                                          |
| Number of intrahepatic lesions     |                                                     |
| 1                                  | 16 (53.3%)                                          |
| $\geq 2$                           | 14 (46.7%)                                          |
| BCLC stage:                        |                                                     |
| 0                                  | 0                                                   |
| A                                  | 0                                                   |
| B                                  | 2 (6.7%)                                            |
| C                                  | 28 (93.3%)                                          |
| Macrovascular invasion:            | 28 (93.3%)                                          |
| Only PV invasion                   | 14 (46.7%)                                          |
| Only PVTT                          | 8 (26.7%)                                           |
| Only HV invasion                   | 5 (16.7%)                                           |
| Only HVTT                          | 3 (10.0%)                                           |
| PV + HV invasion                   | 9 (30.0%)                                           |
| PVTT + HVTT                        | 2 (6.7%)                                            |
| Extra-hepatic metastasis           | 4 (13.3%)                                           |

HBV, hepatitis B virus;

AST, Aspartate transaminase;

ALT, Alanine aminotransferase;

AFP, alpha-feto-protein;

BCLC, Barcelona Clinic Liver Cancer;

PV, Portal vein;

HV, Hepatic vein;

PVTT, Portal vein tumor thrombus;

**Table S4. Tumor response**

| Characteristic | N = 30 <sup>1</sup> | 95% CI    |
|----------------|---------------------|-----------|
| tumor response |                     |           |
| CR             | 16 (53.3%)          | 35%, 71%  |
| PR             | 12 (40.0%)          | 23%, 59%  |
| SD             | 2 (6.7%)            | 1.2%, 24% |

<sup>1</sup>n (%)

Abbreviation: CI = Confidence Interval



**Table S5. mOS, the estimated 1-year, 2-year and 3-year overall survival rates**

| Characteristic          | 1-year (95% CI)   | 2-year (95% CI) | 3-year (95% CI) | mOS<br>(95% CI) | P value <sup>1</sup> |
|-------------------------|-------------------|-----------------|-----------------|-----------------|----------------------|
| Overall                 | 82% (69%, 98%)    | 60% (44%, 81%)  | 53% (36%, 78%)  | — (16, —)       |                      |
| Age                     |                   |                 |                 |                 | 0.17                 |
| < 60 years              | 79% (61%, 100%)   | 51% (30%, 85%)  | 40% (21%, 80%)  | 31 (15, —)      |                      |
| ≥ 60 years              | 86% (69%, 100%)   | 70% (49%, 100%) | — (—, —)        | — (16, —)       |                      |
| Tumor size <sup>2</sup> |                   |                 |                 |                 | 0.76                 |
| > 10 cm                 | 83% (67%, 100%)   | 57% (38%, 87%)  | 57% (38%, 87%)  | — (16, —)       |                      |
| ≤ 10 cm                 | 82% (62%, 100%)   | 64% (41%, 99%)  | — (—, —)        | 31 (16, —)      |                      |
| Tumor count             |                   |                 |                 |                 | 0.00024              |
| multi                   | 62% (41%, 95%)    | 27% (10%, 69%)  | 13% (2.5%, 72%) | 16 (12, —)      |                      |
| single                  | 100% (100%, 100%) | 87% (71%, 100%) | 87% (71%, 100%) | — (—, —)        |                      |
| AFP>400 ng/mL           |                   |                 |                 |                 | 0.012                |
| No                      | 100% (100%, 100%) | 90% (73%, 100%) | 90% (73%, 100%) | — (—, —)        |                      |
| Yes                     | 73% (55%, 96%)    | 42% (24%, 74%)  | 35% (18%, 68%)  | 16 (13, —)      |                      |
| Tumor thrombus          |                   |                 |                 |                 | 0.47                 |
| No                      | 87% (72%, 100%)   | 67% (47%, 95%)  | 57% (36%, 91%)  | — (16, —)       |                      |
| Yes                     | 77% (57%, 100%)   | 51% (30%, 89%)  | 51% (30%, 89%)  | — (13, —)       |                      |

<sup>1</sup>Log-rank test

<sup>2</sup>Diameter of largest tumor

**Table S6. mPFS, the estimated 1-year and 2-year PFS rates**

| Characteristic          | 1-year (95% CI)   | 2-year (95% CI)   | mPFS (95% CI) | P value <sup>1</sup> |
|-------------------------|-------------------|-------------------|---------------|----------------------|
| Overall                 | 55% (38%, 80%)    | 55% (38%, 80%)    | 31 (9.0, —)   |                      |
| Age                     |                   |                   |               | 0.23                 |
| < 60 years              | 53% (30%, 94%)    | 53% (30%, 94%)    | 31 (3.0, —)   |                      |
| ≥ 60 years              | 59% (37%, 95%)    | 59% (37%, 95%)    | — (10, —)     |                      |
| Tumor size <sup>2</sup> |                   |                   |               | 0.24                 |
| > 10 cm                 | 43% (23%, 79%)    | 43% (23%, 79%)    | 12 (5.0, —)   |                      |
| ≤ 10 cm                 | 76% (52%, 100%)   | 76% (52%, 100%)   | 31 (31, —)    |                      |
| Tumor count             |                   |                   |               | 0.0024               |
| multi                   | 28% (11%, 71%)    | 28% (11%, 71%)    | 8.0 (3.0, —)  |                      |
| single                  | 83% (63%, 100%)   | 83% (63%, 100%)   | — (—, —)      |                      |
| Tumor thrombus          |                   |                   |               | 0.55                 |
| No                      | 56% (34%, 93%)    | 56% (34%, 93%)    | 31 (3.0, —)   |                      |
| Yes                     | 56% (33%, 94%)    | 56% (33%, 94%)    | — (9.0, —)    |                      |
| AFP>400 ng/mL           |                   |                   |               | 0.0035               |
| No                      | 100% (100%, 100%) | 100% (100%, 100%) | — (—, —)      |                      |
| Yes                     | 35% (17%, 69%)    | 35% (17%, 69%)    | 9.0 (5.0, —)  |                      |

<sup>1</sup>Log-rank test<sup>2</sup>Diameter of largest tumor

**Table S7. Adverse events**

| Adverse events                                   | Total      | CTCAE ≥ grade 3 |         |         |
|--------------------------------------------------|------------|-----------------|---------|---------|
|                                                  |            | Grade 3         | Grade 4 | Grade 5 |
| Fever                                            | 30         | -               | -       | -       |
| Abdominal pain                                   | 7 (23.3%)  | -               | -       | -       |
| Nausea                                           | 3 (10.0%)  | -               | -       | -       |
| Vomit                                            | 1 (3.3%)   | -               | -       | -       |
| Bone marrow<br>Immunotherapy-related<br>toxicity | 4 (13.33%) | -               | -       | -       |
| Immunotherapy-related<br>pneumonia               | 0          | -               | -       | -       |
| Immunotherapy-related<br>hypothyroidism          | 3 (10.0%)  | -               | -       | -       |
| Skin ulcer/rash/erythema                         | 3 (10.0%)  | -               | -       | -       |
| Liver enzyme abnormalities                       | 25 (83.3%) | -               | -       | -       |
| Bilirubin-related abnormalities                  | 9 (30.0%)  | -               | -       | -       |
| Liver abscess                                    | 0          | -               | -       | -       |
| Cholecystitis                                    | 0          | -               | -       | -       |

CTCAE, the Common Terminology Criteria for Adverse Events.
